# Supplementary material for: Oceanographical Context of the First Bloom of the Silicoflagellate Octactis speculum (Ehrenberg) Recorded to Cause Salmon Mortality in a Galician Ria: Was This Bloom a Rare Event in the Iberian Coast?
Source: MDPI journal article supplement (doi:10.3390/toxins15070435), 2023-07-02
Supplement: s1 [file s1]

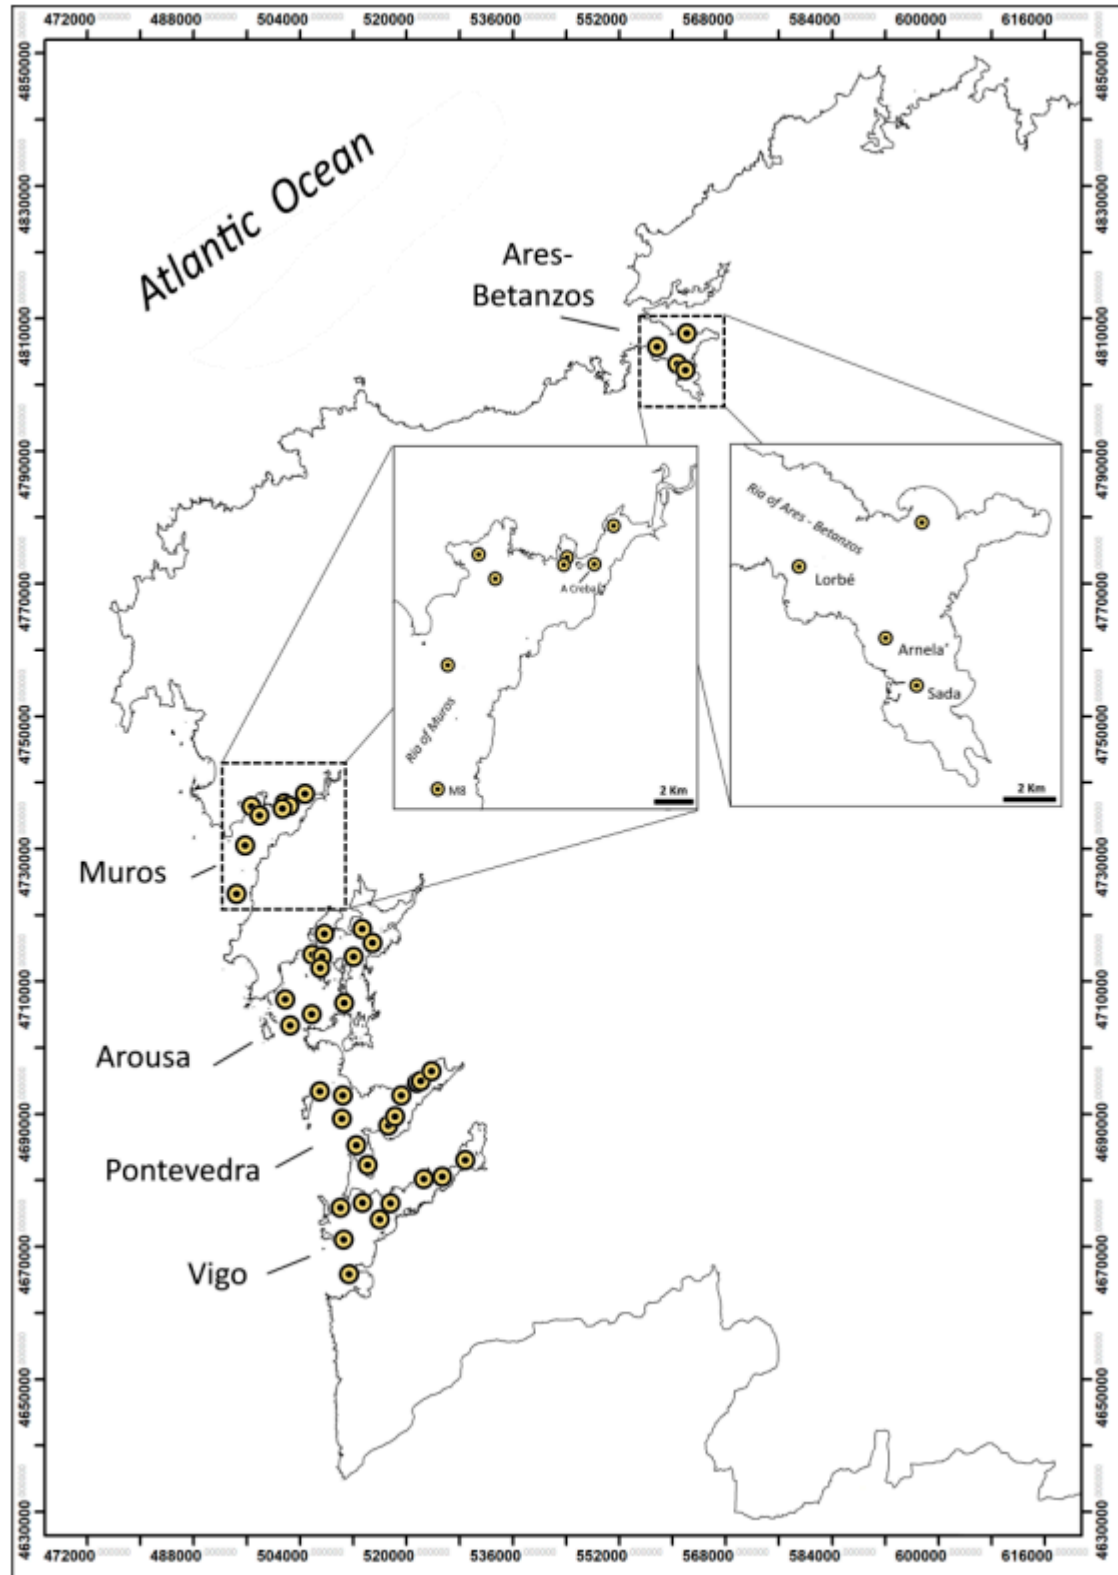

Figure S1. Distribution of the network of oceanographic stations of the INTECMAR (<http://www.intecmar.gal/Ctd/Default.aspx>) in the Galician coast (NW Iberian Peninsula), with detail of the rias of Ares-Betanzos and Muros.
